# Supplementary material for: Highly efficient electrochemical and chemical hydrogenation of 4-nitrophenol using recyclable narrow mesoporous magnetic CoPt nanowires
Source: Royal Society of Chemistry journal article supplement (doi:10.1039/c6ta07149j), 2016-01-01
Supplement: c6ta07149j1.pdf [file c6ta07149j1.pdf]

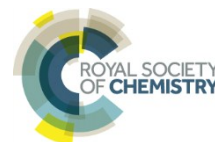

## Journal of Materials Chemistry A

### Electronic Supplementary Information

#### Highly efficient electrochemical and chemical hydrogenation of 4-nitrophenol using recyclable narrow mesoporous magnetic CoPt nanowires

Albert Serrà,<sup>a</sup> Xavier Alcobé,<sup>b</sup> Jordi Sort,<sup>c, d</sup> Josep Nogués<sup>d, e</sup> and Elisa Vallés<sup>a, \*</sup>

- 
- <sup>a.</sup> Grup d'Electrodeposició de Capes Primes i Nanoestructures (GE-CPN), Departament de Ciència de Materials i Química Física and Institut de Nanociència i Nanotecnologia (IN<sup>2</sup>UB), Universitat de Barcelona, Martí i Franquès, 1, E-08028, Barcelona, Catalonia, Spain.
- <sup>b.</sup> Unitat de DRX, Centres Científics i Tecnològics, Universitat de Barcelona, CCiTUB, Lluís Solé i Sabarís, 1–3, E-08028, Barcelona, Catalonia, Spain.
- <sup>c.</sup> Departament de Física, Universitat Autònoma de Barcelona, E-08193, Bellaterra, Catalonia, Spain.
- <sup>d.</sup> ICREA, Pg. Lluís Companys 23, 08010, Barcelona, Spain.
- <sup>e.</sup> Catalan Institute of Nanoscience and Nanotechnology (ICN2), CSIC, The Barcelona Institute of Science and Technology, Campus UAB, E-08193, Bellaterra, Catalonia, Spain.

## Cronoamperometric curves of the nanowires electrosynthesis

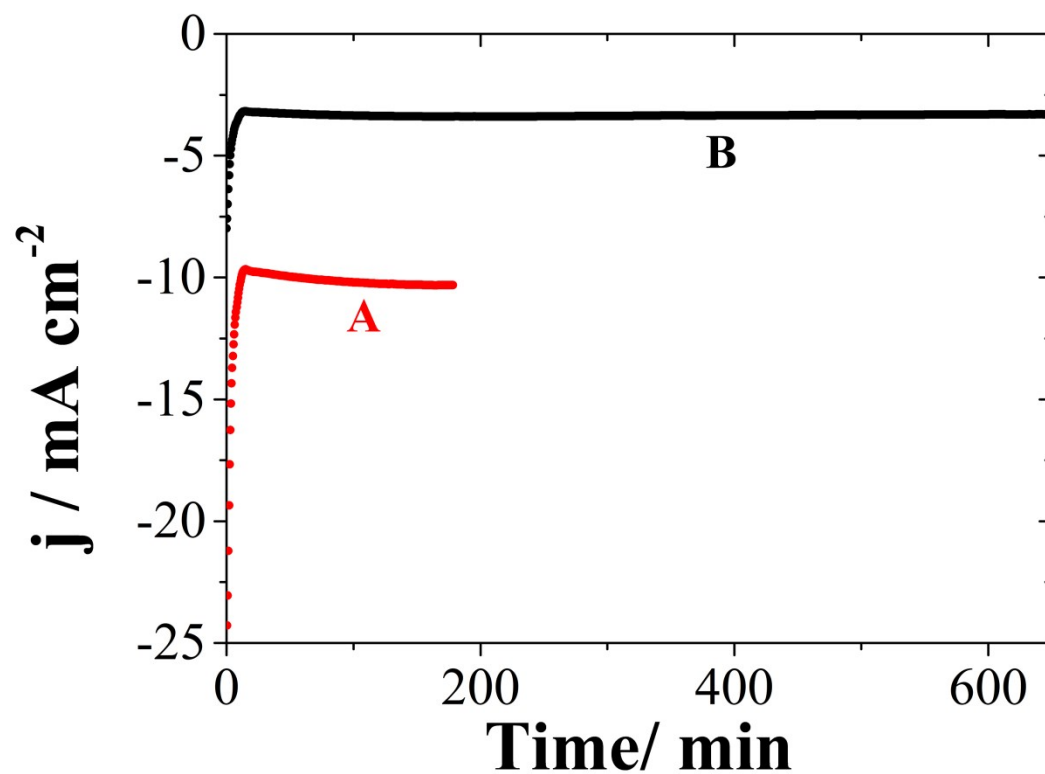

**Figure 1S:** Cronoamperometric curves of the electrosynthesis inside the nano-channels of alumina membranes, at -1.0 V vs Ag/AgCl and 25 °C, of Co–Pt nanowires to attain the same deposition charge density ( $2.1 \text{ C cm}^{-2}$ ) in (A) aqueous solution and (B) IL/W microemulsion.

**FE-SEM images of alumina membranes**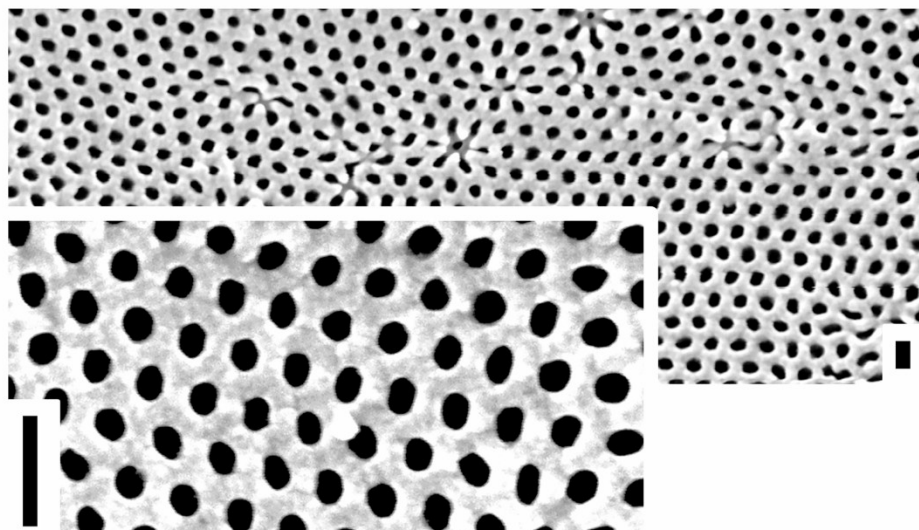

**Figure 2S:** FE-SEM micrographs of alumina membranes used to synthesize nanowires. Scale bar: 100 nm.

## TEM-Energy dispersive X-ray spectroscopy and HR-TEM

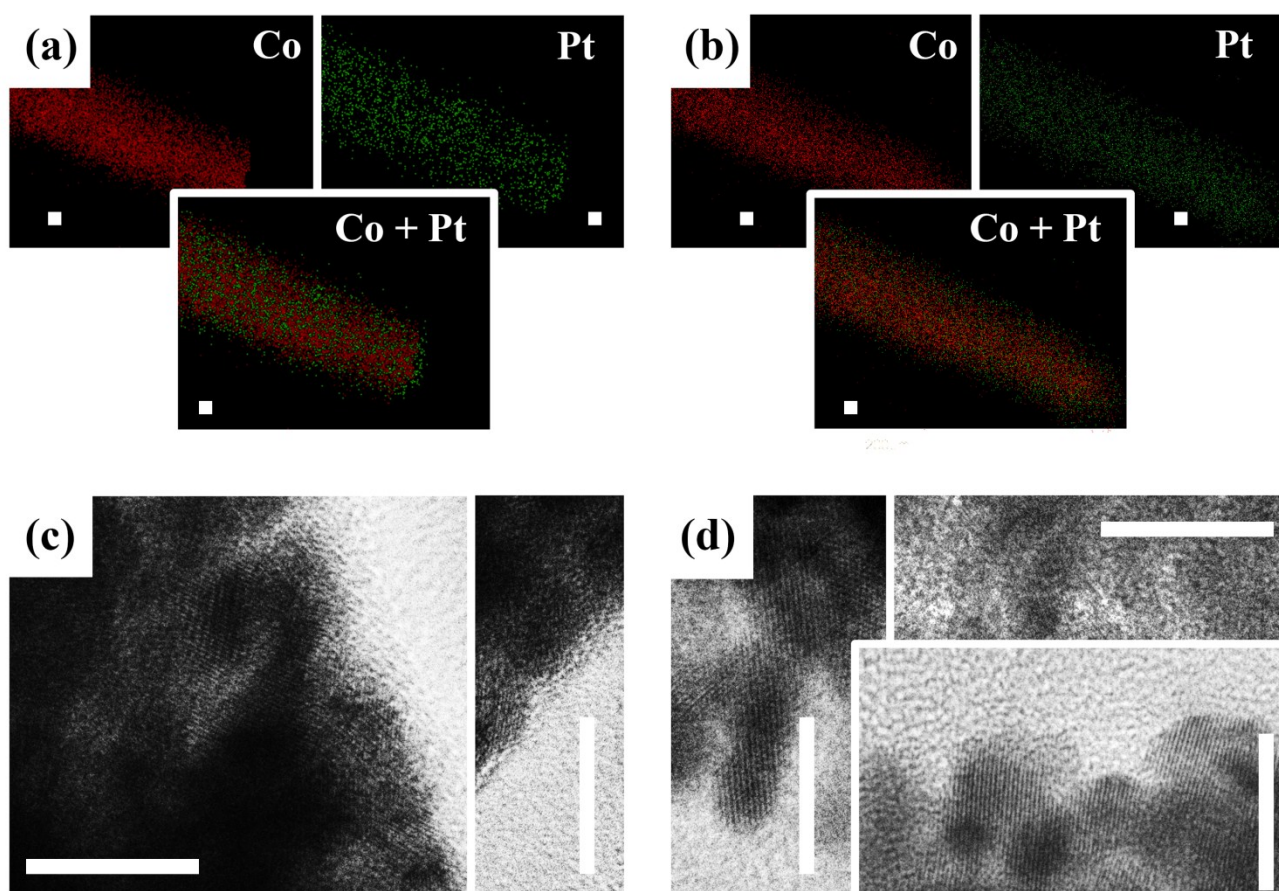

**Figure 3S:** Elemental mapping of Co-Pt compact (a) and mesoporous (b) NWs using an EDS-TEM and HRTEM images of compact (c) and mesoporous (d) NWs. Scale bar: 5 nm.

## X-Ray Diffraction characterization

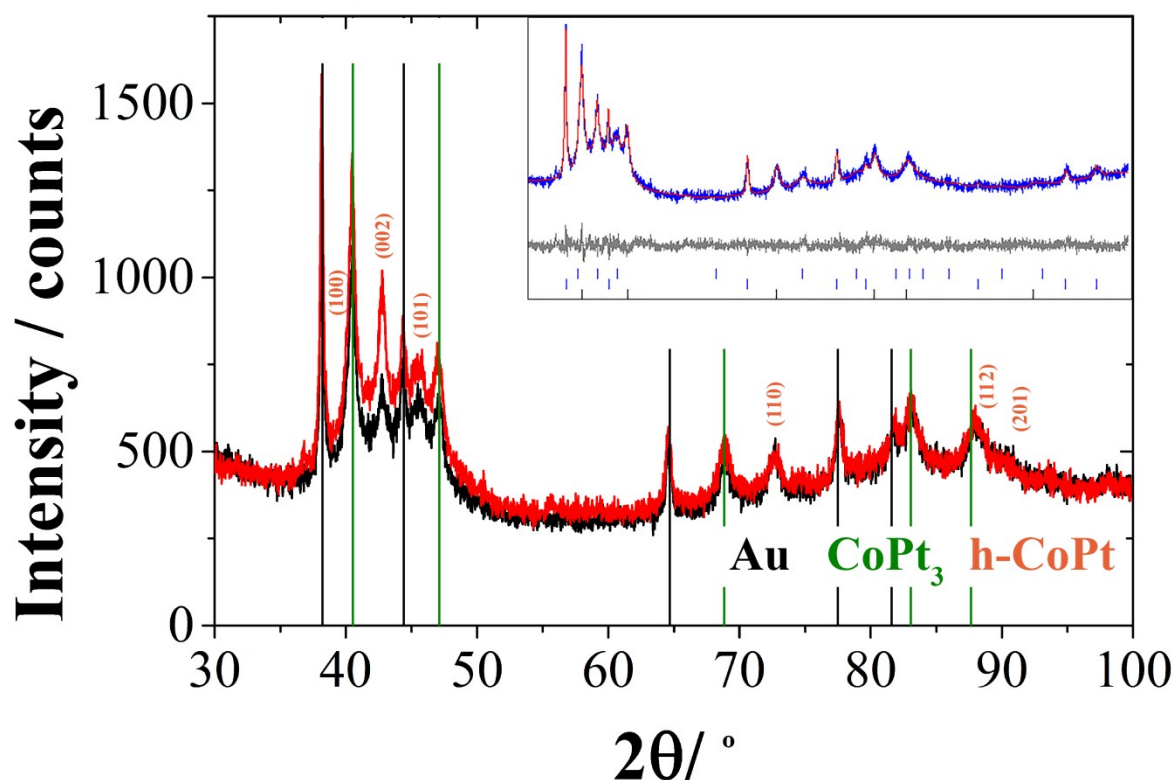

**Figure 4S:** XRD patterns of the two NW's samples: compact (red) and mesoporous (black). The position of the main Au and CoPt<sub>3</sub> are indicated by vertical bars, while the miller indexes of the main peaks of the hexagonal CoPt (h-CoPt) phase are indicated next to the corresponding peaks. Inset: Experimental (blue) and Rietveld fit (red) XRD patterns of the compact nanowires. The residuals of the fit are shown in grey at the bottom of the graph.

From the x-ray diffraction (XRD) patterns two phases were immediately identified: *fcc* Au, corresponding to some remaining gold in the nanowires, and *fcc* CoPt<sub>3</sub> (Pm-3m) (see Figure 3S). The remaining peaks are indexed to a hexagonal *hcp* phase, assigned to a CoPt alloy (i.e., the same phase as *hcp* Co but very distorted due to the incorporation of Pt atoms in the crystalline lattice – P6<sub>3</sub>mmc). Rietveld profile analyses were performed using the TOPAS v5 software.<sup>[1,3]</sup> Note that the Co–Pt phase was treated and refined by profile pattern matching according to Pawley.<sup>[4]</sup>

The parameters obtained from the fit are summarized in **Table 1S**.

| NW type   | Phase                        | Cell parameters / Å |           | Crystallite size / nm |
|-----------|------------------------------|---------------------|-----------|-----------------------|
| Compact   | CoPt <sub>3</sub> <i>fcc</i> | a = 3.855           |           | 11.9                  |
|           | CoPt <i>hcp</i>              | a = 2.603           | c = 4.222 | 4.8                   |
| Mesoporus | CoPt <sub>3</sub> <i>fcc</i> | a = 3.855           |           | 11.4                  |
|           | CoPt <i>hcp</i>              | a = 2.604           | c = 4.211 | 5.4                   |

**Table 1S.** Cell parameters and crystallite size of CoPt<sub>3</sub> and CoPt phases in the compact and mesoporous NWs.

## Magnetic Properties

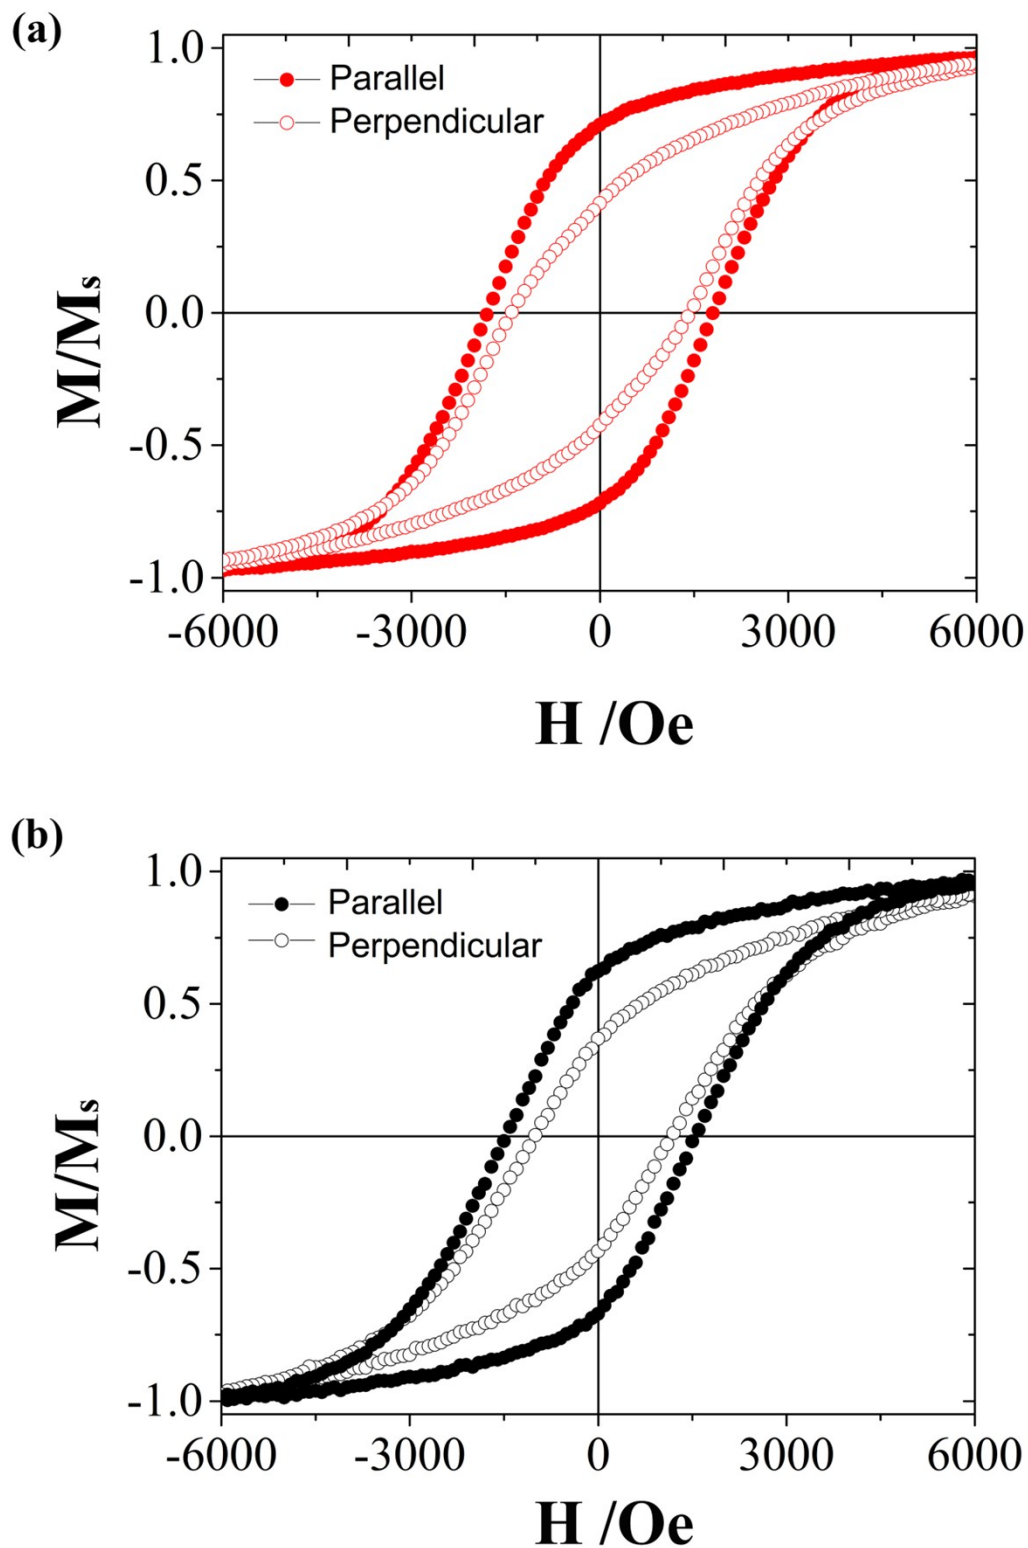

**Figure S5:** Room-temperature (300 K) parallel and perpendicular to the wire axis hysteresis loop of the compact (a) and mesoporous (b) Co–Pt NWs.

## Electrochemical Surface Areas (ECSAs) of Co–Pt NWs

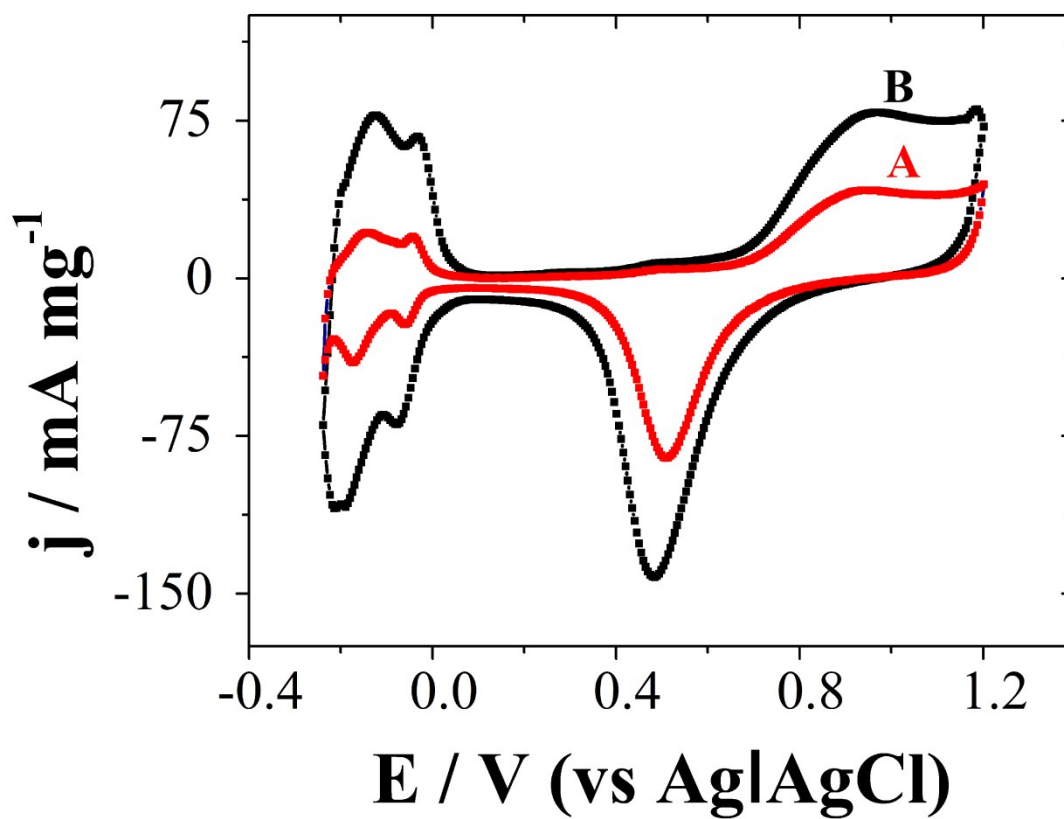

**Figure 6S:** Cyclic voltammetry in H<sub>2</sub>SO<sub>4</sub> 0.5 M solutions at 25 °C with a scan rate of 20 mV s<sup>-1</sup> for Co-Pt compact (A) and mesoporous (B) NWs.

## UV-visible spectra of 4-nitrophenol and 4-aminophenol

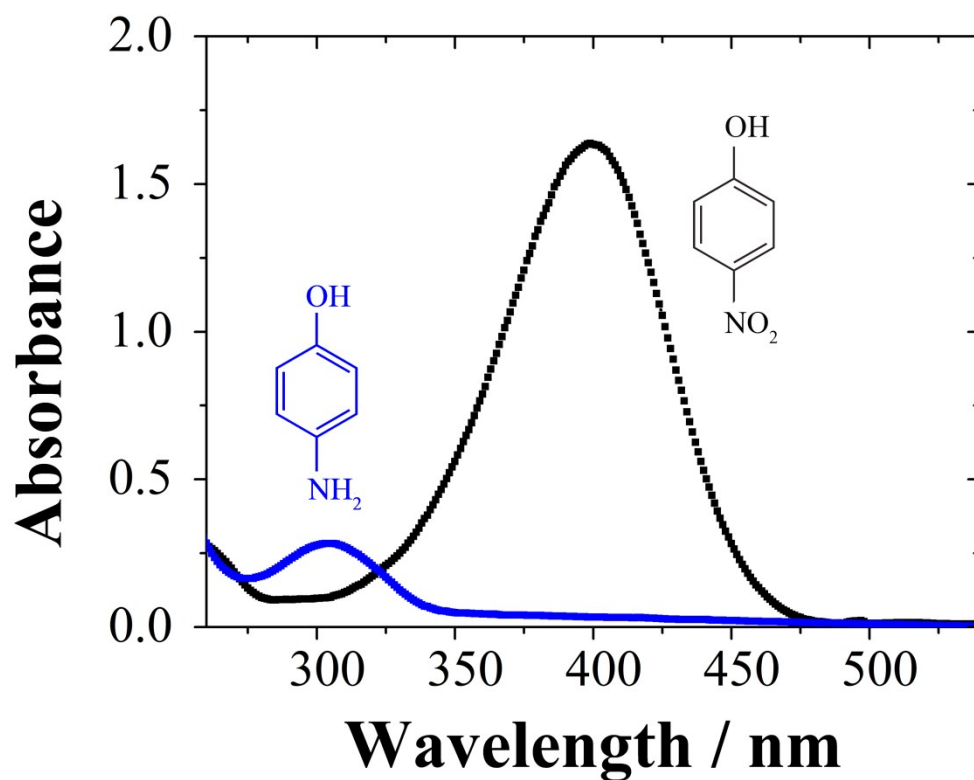

Figure 7S: UV-visible spectra of 4-nitrophenol and 4-aminophenol.



## Comparison of the catalytic performance

| Catalyst               | $K_{\text{app}} / \text{ms}^{-1}$ | $K_{\text{nor}} / \text{s}^{-1} \text{g}^{-1}$ | Reference |
|------------------------|-----------------------------------|------------------------------------------------|-----------|
| Compact Co – Pt NWs    | 1.8                               | 1538                                           | This work |
| Mesoporous Co – Pt NWs | 5.7                               | 4713                                           | This work |
| PCN-224-700            | 5.3                               | -                                              | 5         |
| Pt–Au pNDs/RGOs        | 3.8                               | 926                                            | 6         |
| Pd micromotor          | 6.6                               | -                                              | 7         |
| Pt3Au1-PDA/RGO         | 9.6                               | 1700                                           | 8         |
| Pt55Pd38Bi7 nanowires  | 5.2                               | 74                                             | 9         |
| MSNCs–Ag               | 17.0                              | 850                                            | 10        |
| AuPd nanocrystals      | 5.2                               | 74                                             | 11        |
| Fe@Au-ATPGO            | 1.4                               | 400                                            | 12        |

**Table 2S:** Comparison of the catalytic performances of Co–Pt NWs with other catalysts previously reported for the reduction of 4-NP.

## Electrochemical Surface Area after be used as electro-catalysts

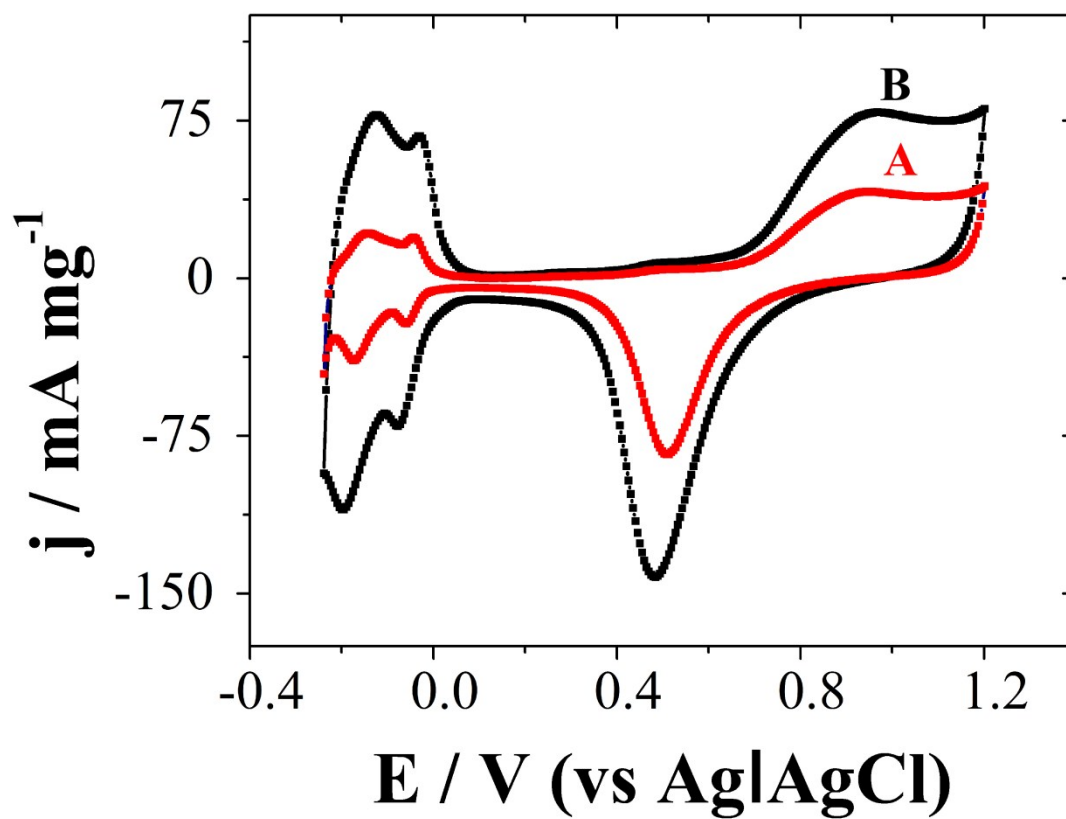

**Figure 8S:** Cyclic voltammetry in  $\text{H}_2\text{SO}_4$  0.5 M solutions at 25 °C with a scan rate of  $20 \text{ mV s}^{-1}$  for Co-Pt compact (A) and mesoporous (B) NWs after be used as electro-catalysts.

## Time-dependent UV–Visible spectra of 4-NP catalysed reduction – Pure Pt and Co NWs

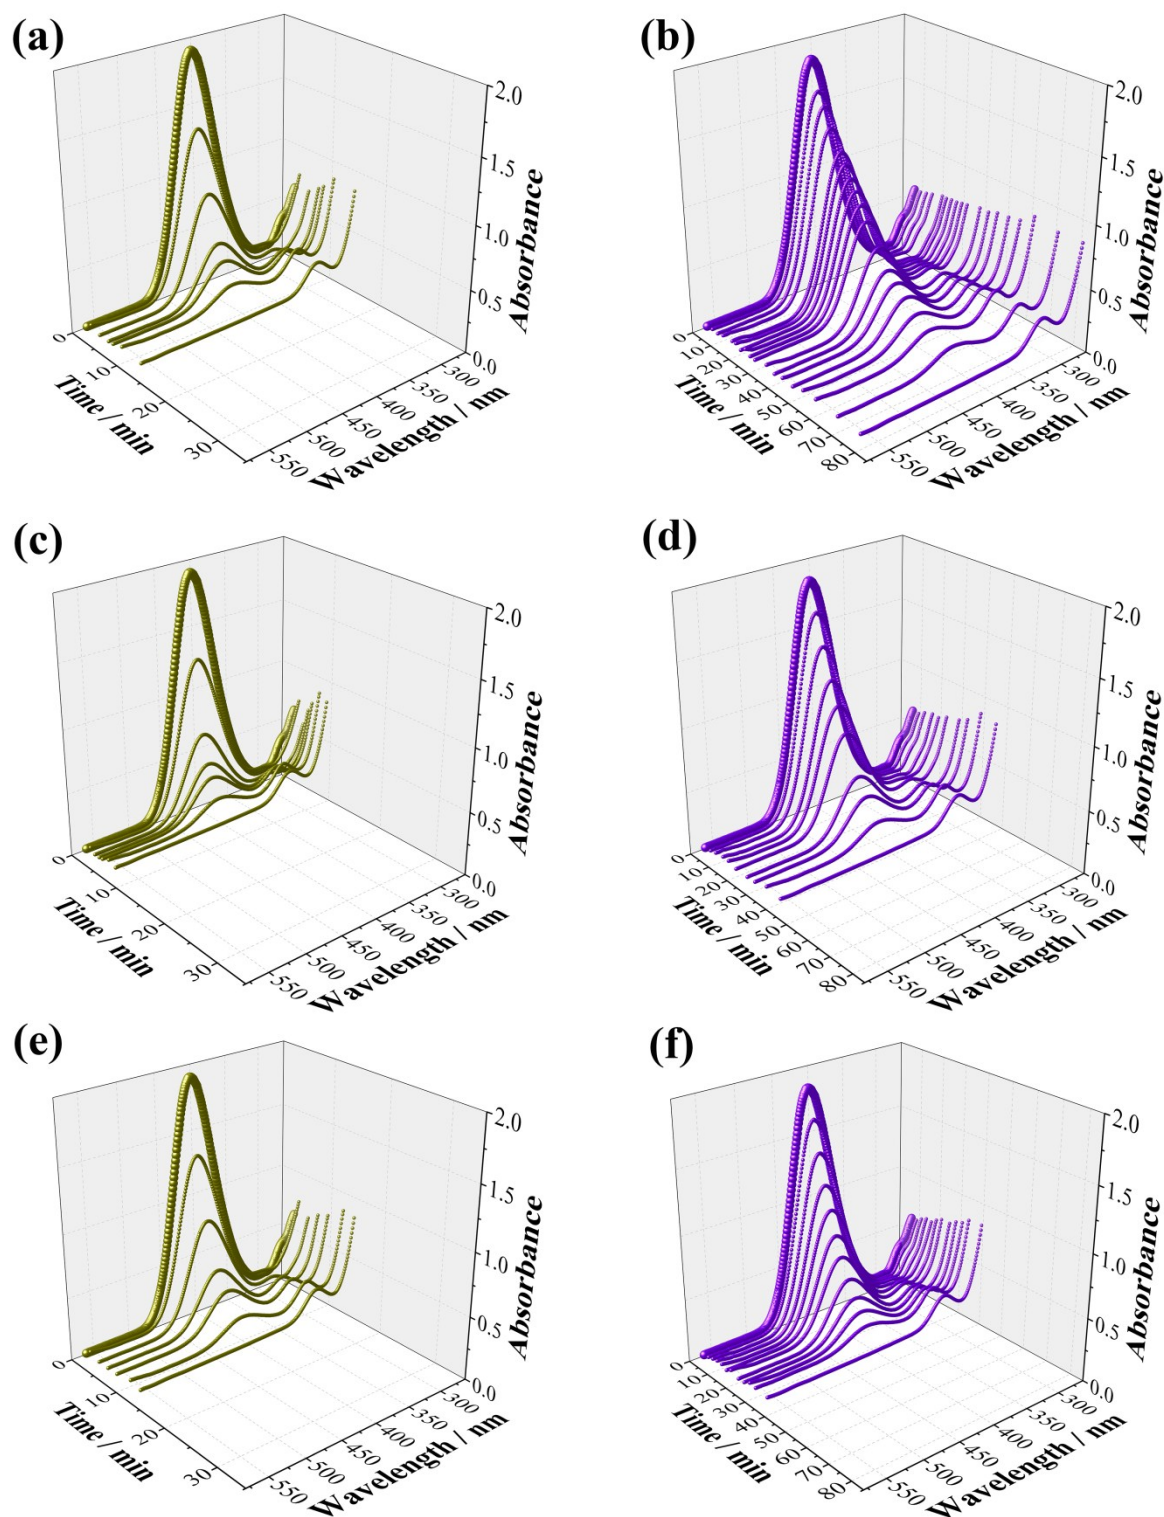

**Figure 9S:** Time-dependent UV–Visible spectra of 4-NP catalysed reduction in silent (panels a and b, for pure Pt and Co mesoporous NWs, respectively), intermittent ultrasound stirring (panels c and d, for pure Pt and Co mesoporous NWs, respectively) and magnetic stirring (panels e and f, for pure Pt and Co mesoporous NWs, respectively) conditions, in which 12  $\mu\text{L}$  of a suspension of catalyst ( $0.1 \text{ mg mL}^{-1}$ ) were added.

## Kinetic constants – Pure Pt and Co NWs

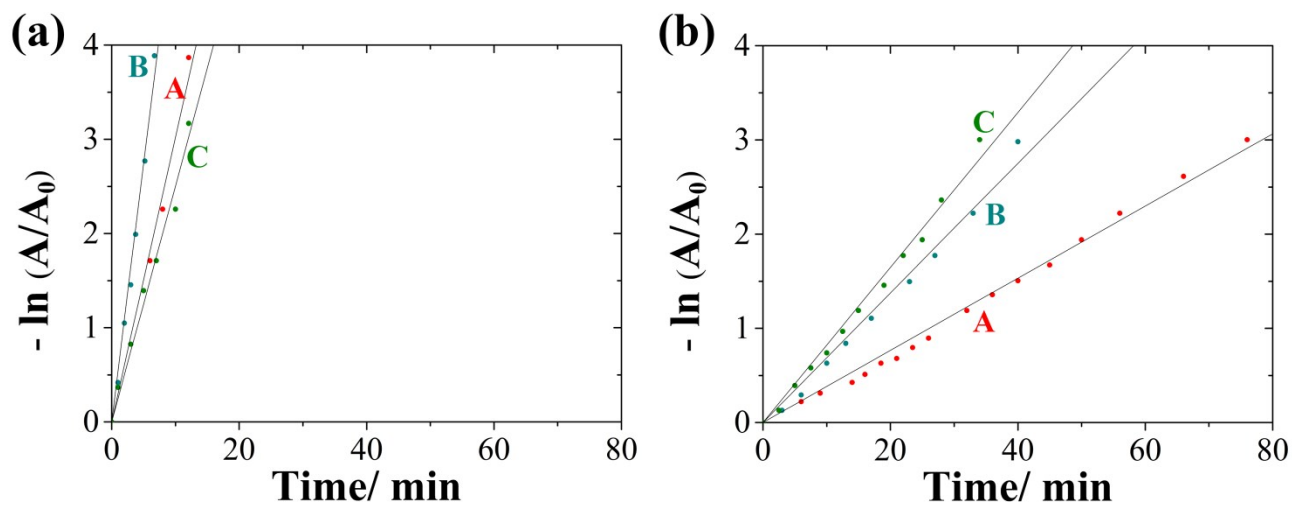

**Figure 10S:** Plots of  $-\ln(A/A_0)$  against reaction time for the catalysed reduction of 4-NP by (a) Pt and (b) Co mesoporous NWs in silent (A), intermittent ultrasound stirring (B) and magnetic stirring (C) conditions.

## Catalyst Reusability

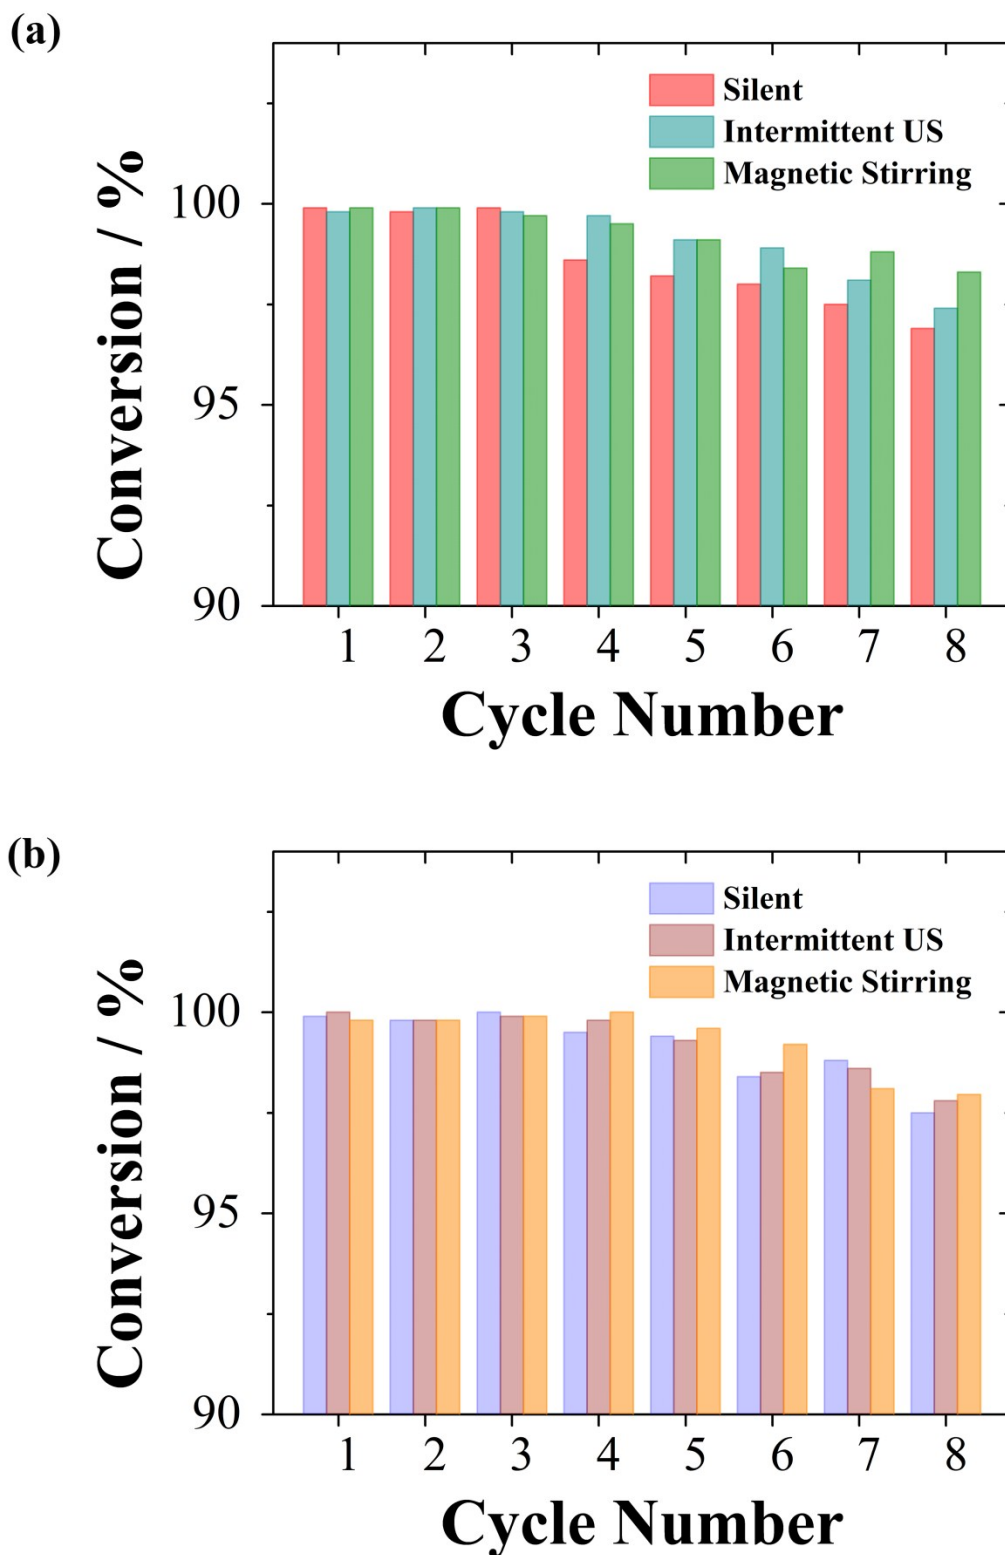

**Figure 115:** Reusability of Co-Pt compact (a) and mesoporous (b) NWs as the catalyst for the reduction of 4-NP in eight successive cycles.

## References

- [1] H. Rietveld, *J. Appl. Cryst.*, 1969, **2**, 65.
- [2] A. Coelho, J. Evans, I. Evans, A. Kern, and S. Parsons, *Powder Diffr.* 2011, **26**, S22.
- [3] Bruker AXS. (2011). TOPAS, v5.0 (Computer Software). Bruker AXS. Karlsruhe, Germany.
- [4] G. S. Pawley, *J. Appl. Cryst.* 1981, **14**, 357.
- [5] G. Huang, L. Yang, X. Ma, J. Jiang, S.-H. Yu, and H.-L. Jiang, *Chem. Eur. J.* 2016, **22**, 3470.
- [6] J.-J. Lv, A.-J. Wang, X. Ma, R.-Y. Xiang, J.-R. Chen, and J.-J. Feng, *J. Mater. Chem. A* 2015, **3**, 290.
- [7] S. K. Srivastava, M. Guix, and O. G. Schmidt, *Nano Lett.* 2016, **16**, 817.
- [8] W. Ye, J. Yu, Y. Zhou, D. Gao, D. Wang, C. Wang, and D. Xue, *Appl. Catal. B-Environ.* 2016, **181**, 371.
- [9] Y.-Y. Shen, Y. Sun, L.-N. Zhou, Y.-J. Li, and E. S. Yeung, *J. Mater. Chem. A* 2014, **2**, 2977.
- [10] G. Cui, Z. Sun, H. Li, Z. Liu, Y. Tian, and S. Yan, *J. Mater. Chem. A* 2016, **4**, 1771.
- [11] S. K. Ghosh, M. Mandal, S. Kundu, S. Nath, and T. Pal, *Appl. Catal. A*, 2004, **268**, 61.
- [12] V. K. Gupta, N. Atar, M. L. Yola, Z. Üstündag, and L. Uzun, *Water Res.* 2014, **48**, 210.
